# Supplementary material
Source: publisher figshare collection journal article supplement (https://karger.figshare.com/ndownloader/files/33024398)
Supplement: Supplementary file 1 [file 33024398]

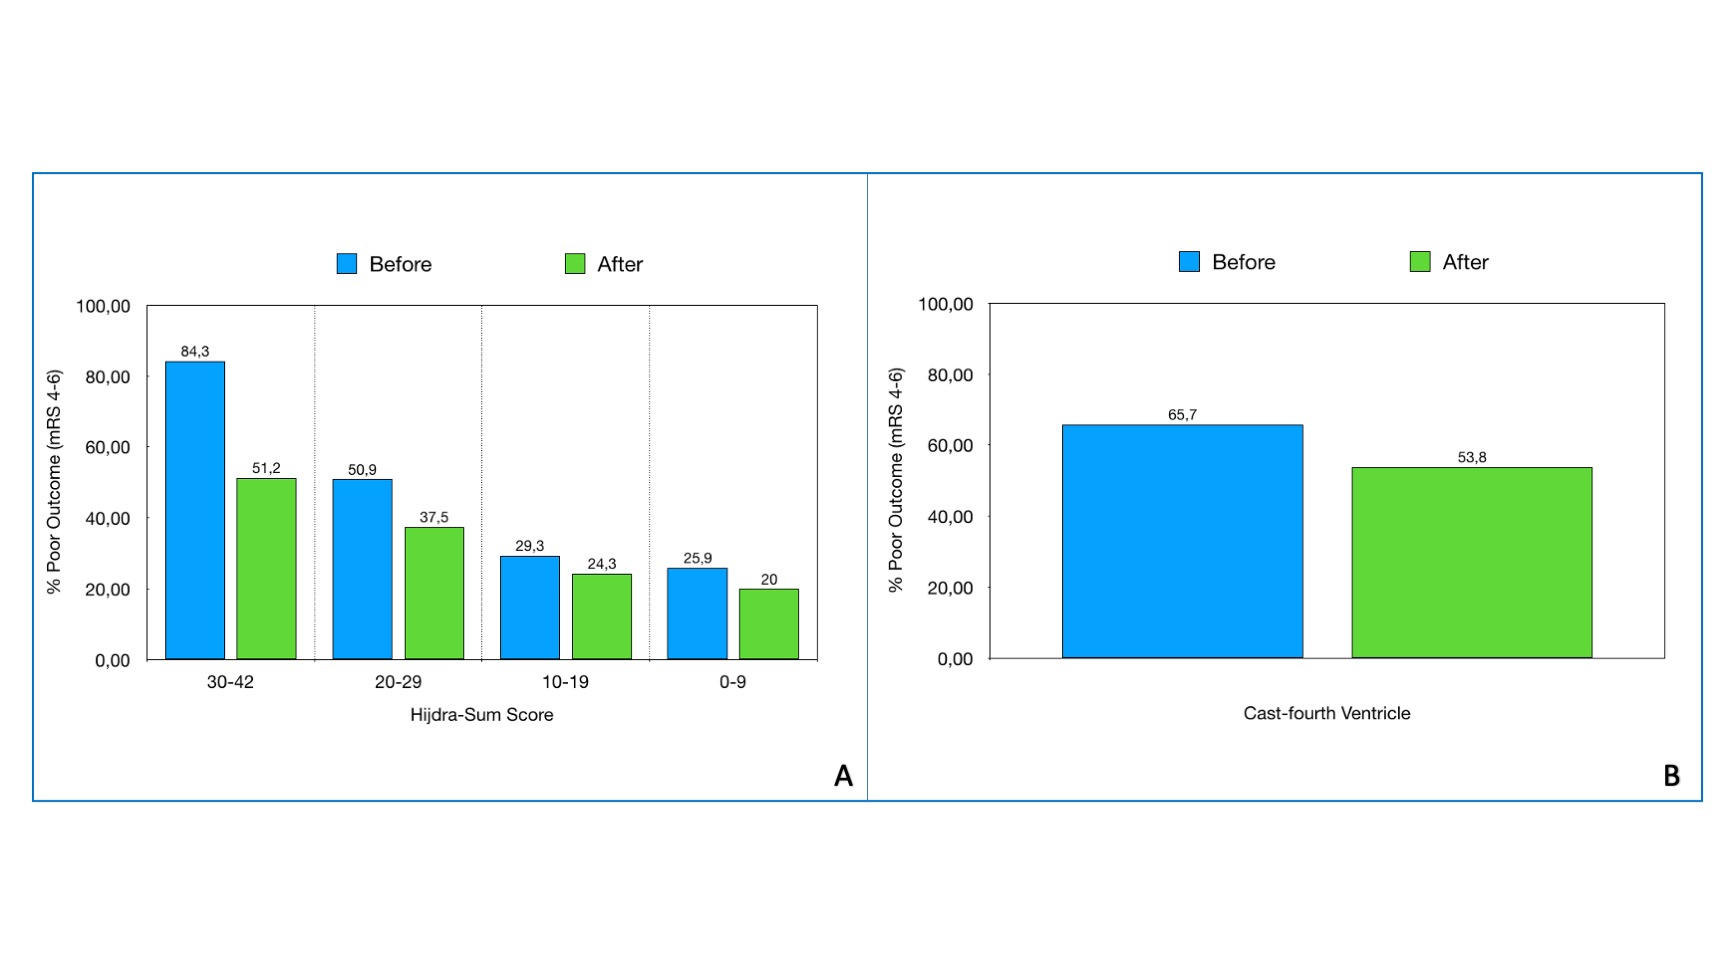


**Figure legend:**

A) Bar chart of the percentage of patients with poor neurological outcome (mRS) 6 months after ictus, categorized according to their Hijdra Score and their cohort group. B): Percentage of poor mRS scores as for cast fourth ventricle and cohort groups.
